# Supplementary material for: Association of military-specific reaction time performance with physical fitness and visual skills
Source: PeerJ. 2022 Sep 1;10:e14007. doi: 10.7717/peerj.14007 (PMC9441139; doi:10.7717/peerj.14007)
Supplement: Supplemental Information 1 [file peerj-10-14007-s001.xlsx]

## Sheet: Database
1- military personnel; 2- students		REACTION TIME			bench press			squat			Visual data
	ID	Simple RT	Go/No Go	V02 max (ml/kg/min)	L0_BP	V0_BP	Aline_BP	L0_SQ	V0_SQ	Aline_SQ	MOT (Multiple-object tracking)	DVA (dynamic visual acuity) treshold	DVA (dynamic visual acuity) reaction time
1	1	458.926	589.571	45.2	75.6936	2.13869	80.9427	127.373	1.86809	118.972	14.5	-0.2	2783
1	2	386.073	614.25	48.3	88.3908	1.9803	87.5202	151.431	1.65467	125.284	14.5	0.2	1002
1	3	561.92	548.704	37.1	76.182	2.48236	94.5555	120.457	1.8936	114.048	13.2	0.1	1421
1	4	427.057	524.72	44	101.448	1.83823	93.2421	101.544	1.73719	88.2003	11.9	0	965
1	5	396.52	545.615	37.5	66.661	2.08157	69.3799	99.1343	1.78336	88.396	13.2	0.2	1243
1	6	454.342	591.182	39.5	123.603	1.83806	113.595	138.149	1.71403	118.395	11.9	0.3	895
1	7	301.161	471.083	40.5	79.6602	2.0742	82.6156	121.725	1.54036	93.7497	19.7	0.2	1408
1	8	304.68	442.095	52.6	81.2235	2.14975	87.3051	121.914	1.56646	95.4866	10.6	0.2	1384
1	9	391.286	498.321	51.7	80.3207	2.08538	83.7496	117.185	1.45823	85.4417	15.8	0.2	1293
1	10	415.518	485.44	52.9	86.6267	2.22998	96.5879	103.912	2.13296	110.82	15.8	0.2	1099
1	11	417.673	585.815	50.8	85.9275	1.97625	84.9071	93.1945	2.07543	96.7094	10.6	0.5	778
1	12	431.636	461.741	47.7	73.9346	1.86099	68.7959	110.766	1.5332	84.9132	10.9	0	3005
1	13	409.709	479.808	54.3	70.5996	2.07486	73.2421	97.63	1.80708	88.2124	11.9	-0.1	1787
1	14	378.055	489.037	48.6	73.7115	2.17416	80.1302	103.758	1.64992	85.5962	18.4	0.6
1	15	311.057	549.769	49.5	84.7845	2.29838	97.4334	133.01	1.84788	122.893	13.2	0	2633
2	1	476.667	643.111	53.2	71.6812	2	71.8366	121.294	1.3	78.2258	11.9	0.3	1426
2	2	481.327	646.308	40.5	88.6653	2.3	102.039	126.041	1.5	93.6912	8	0.1	1901
2	3	450.125	619.222	45.9	62.84	2	63.6668	146.531	1.6	117.016	15.8	0.2	1219
2	4	501.259	586.36	53.8	126.38	1.9	122.862	223.244	1.6	180.347	13.2	0.6
2	5	422.554	595.444	57.1	66.376	2.2	73.6956	111.021	1.9	104.947	10.6	0.2	1319
2	6	563.481	636.52	45.2	101.383	1.9	95.1698	145.873	1.7	122.986	10.6	0.2	1253
2	7	493	615	36.4	90.5937	1.8	80.5193	146.473	1.4	103.649	13.2	0.1	1623
2	8	527.648	555.731	48.3	63.6953	1.9	61.2295	120.274	1.5	91.5064	21	0.4	729
2	9	425.962	581.667	39.5	91.7596	1.9	85.9809	137.374	1.6	112.35	10.6	0.4	485
2	10	513.464	591.5	43.7	82.8862	2	84.4473	123.565	1.8	108.27	14.5	0.5	611
2	11	594.393	699.76	48.9	87.9823	2.1	92.7697	145.555	1.7	127.164	9.3	0.4	1151
2	12	497.455	571.038	33	100.575	1.8	92.3776	170.12	1.6	135.812	15.8	0.3	883
2	13	559.873	648.28	36	64.8269	2	64.0134	82.7523	1.5	61.9771	15.8	-0.2	1321
2	14	531.143	595.444		93.9754	1.8	86.6197	174.981	1.5	133.72	13.2	0.4	813
2	15	548.679	626.192	48.6	75.4541	2.2	81.5862	130.377	1.5	94.5996	10.6	0.3	1391
